# Supplementary material
Source: publisher figshare collection journal article supplement (https://acs.figshare.com/ndownloader/files/12739559)
Supplement: Supplementary file 1 [file 12739559]

## Supporting Information

# **Avidin Adsorption to Silk Fibroin Films as a Facile Method for Functionalization**

Alycia Abbott<sup>1</sup>, Leif Oxburgh<sup>2</sup>, David L. Kaplan<sup>3</sup>, Jeannine M. Coburn<sup>1,3</sup>

<sup>1</sup>Worcester Polytechnic Institute, Worcester Massachusetts 01605, United States; <sup>2</sup>Maine Medical Center Research Institute, Scarborough, Maine 04074; <sup>3</sup>Tufts University, Medford, Massachusetts 02155, United States

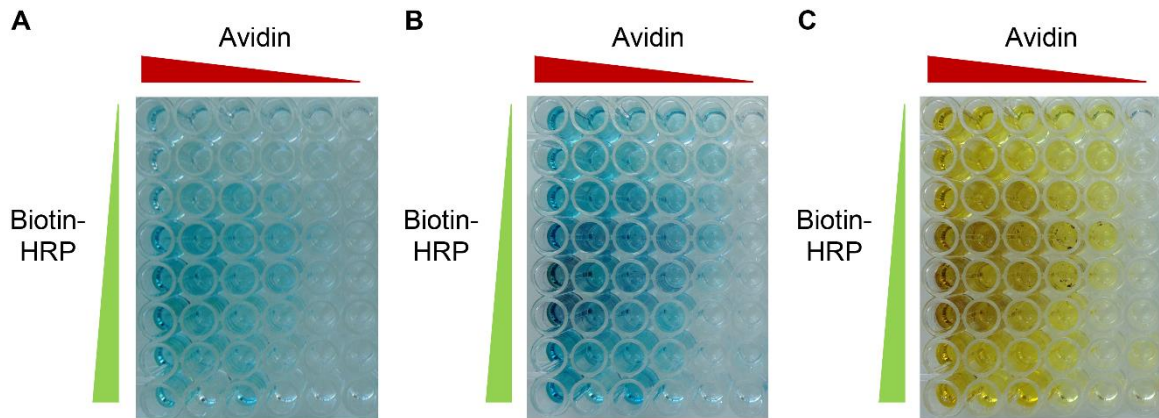

**Figure S1. Colorimetric characterization of avidin and B-HRP adsorption.** Avidin and B-HRP concentrations were varied to determine the optimal combination of concentrations. HRP was detected via the addition of a clear substrate (TMB) that is cleaved by HRP, forming a blue color. (A) Image taken immediately after adding TMB substrate to the wells. (B) Second image taken six minutes after the image in (A). (C) Image taken after adding 2 M sulfuric acid to stop the enzymatic reaction.

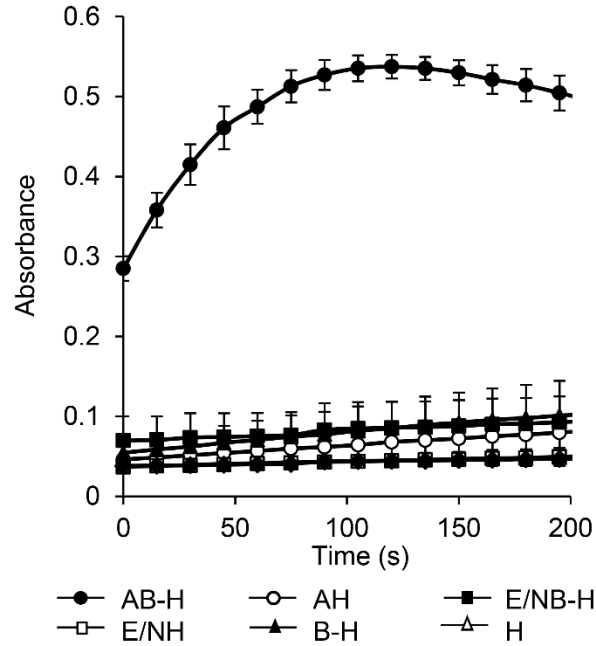

**Figure S2. Raw data of kinetic curves of adsorbed or covalently coupled HRP moiety functionalized silk films.** Biotin-HRP or HRP (5  $\mu\text{g/mL}$ ) were adsorbed onto silk films modified with avidin or carboxylate activation. HRP activity was monitored via TMB cleavage forming a blue chromophore detected at 650 nm (15 s between each measurement). A faster rate of change (higher slope) indicates greater HRP activity. AB-H modified silk films had the highest HRP activity. Data are presented as mean  $\pm$  SEM of three independent experiments with 3-6 samples each. Key: **AB-H**: Avidin with Biotin-HRP; **AH**: Avidin with HRP; **E/NB-H**: EDC/NHS with Biotin-HRP; **E/NH**: EDC/NHS with HRP; **B-H**: Biotin-HRP background control; **H**: HRP background control well.

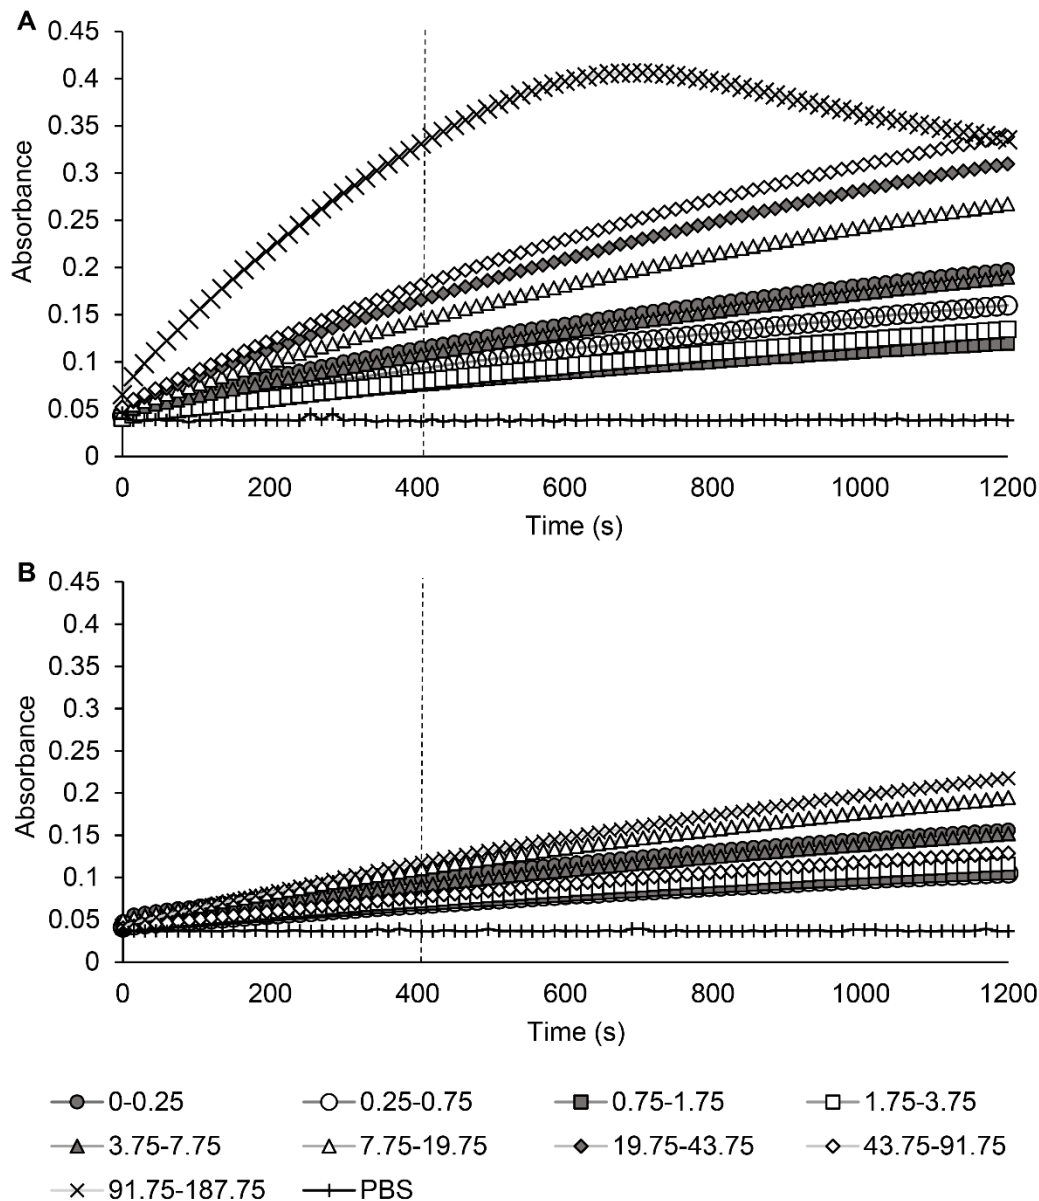

**Figure S3. Raw data of kinetic curves of A-HRP released from surface of silk films.** Kinetic activity of A-HRP released from silk films at labelled time delta (in h), measured through TMB colorimetric assay from (A) overnight adsorption and (B) 1-hour adsorption. Higher absorbance values indicate greater enzyme activity. Downward slope indicates exhaustion of TMB substrate and formation of precipitate by A-HRP. Dashed line indicates values used to determine release data found in Figure 4. Graph of kinetic activity is representative of three experiments with 8 samples each.

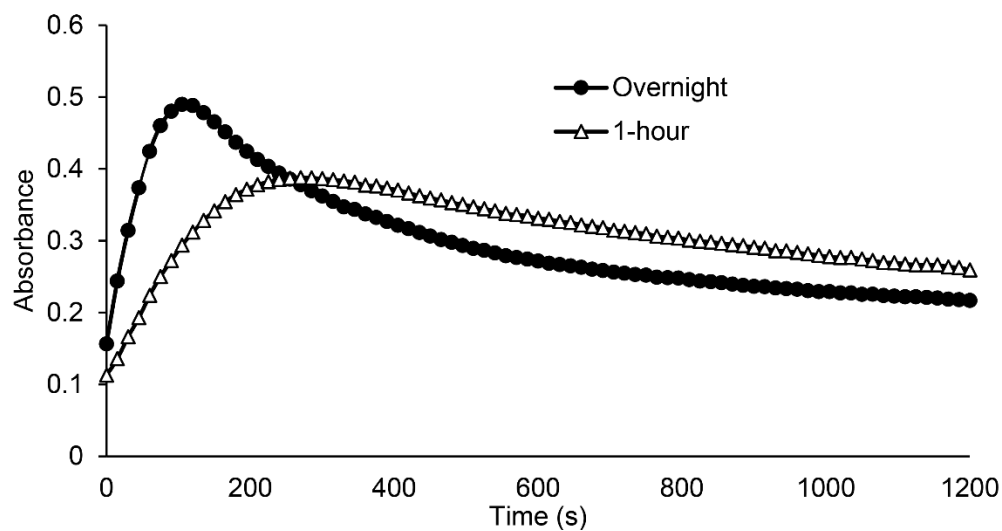

**Figure S4. Raw data of kinetic curves of A-HRP remaining on surface of silk films.** Kinetic activity of A-HRP present on silk films at release experiment end-point measured through TMB colorimetric assay. A faster rate of change (higher slope) indicates greater A-HRP activity. The downward slope indicates exhaustion of TMB substrate and formation of precipitate by A-HRP. Graph of kinetic activity is representative of three experiments with 8 samples.

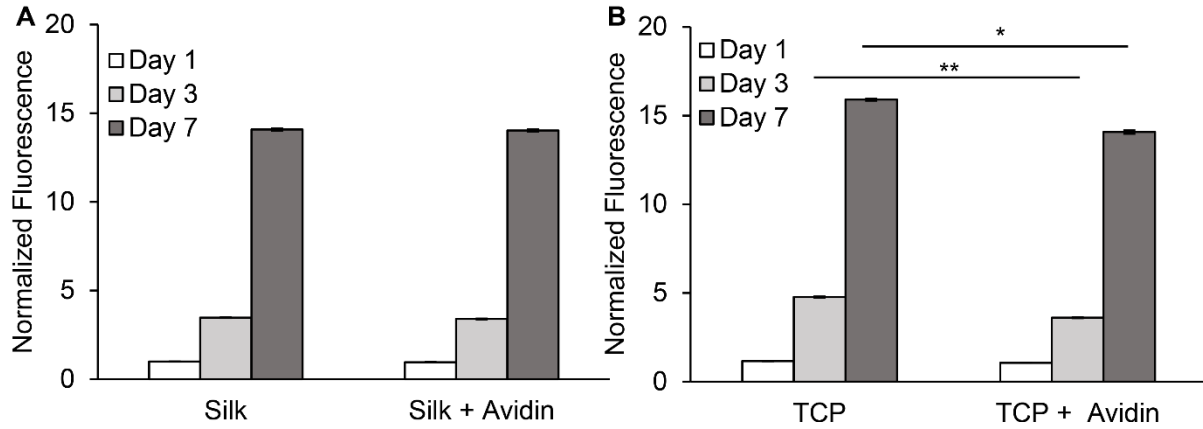

**Figure S5. Metabolic activity of hFFs on avidin-modified surfaces.** Data is presented as the normalized fluorescence of resazurin incubated with hFFs after 1, 3, and 7 d of culture. Data shown as average with SEM (N = 4 with 12 samples each). All values normalized to average fluorescence value for day 1 silk-only wells (\* $p < 0.05$ , \*\* $p < 0.01$  as compared to silk only controls). H indicates  $10^{-7}$  M. L indicates  $10^{-8}$  M. + indicates inclusion, - indicates exclusion. TCP is tissue culture-treated plastic.

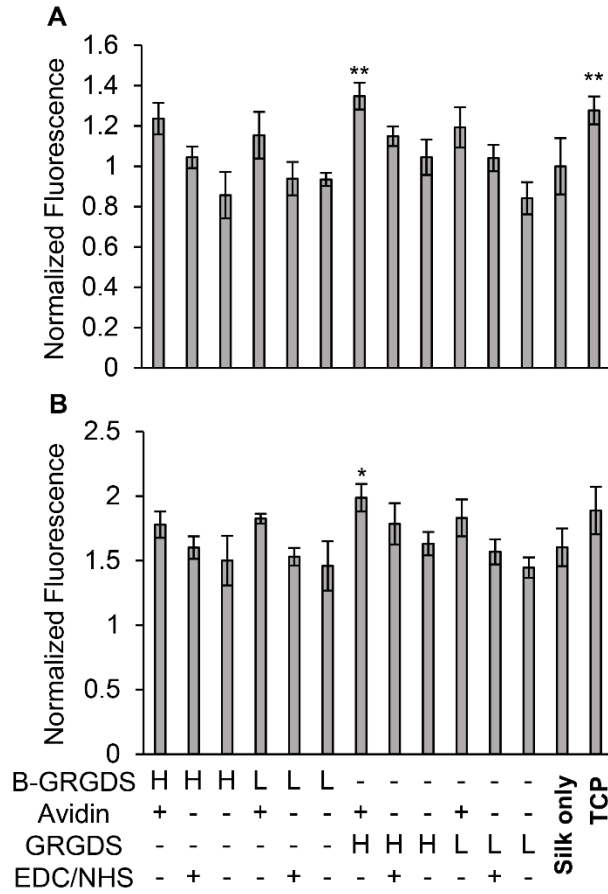

**Figure S6. Metabolic activity of hMSCs on modified silk films at Day 1 and 3 of culture.**

Normalized fluorescence of resazurin incubated with hMSCs after (A) 1 d and (B) 3 d of culture.

Data shown as average with standard deviation. All values are normalized to the average fluorescence for hMSCs cultured for 1 d on silk only wells (\* $p < 0.05$ , \*\* $p < 0.01$  as compared to silk only controls). H indicates  $10^{-7}$  M. L indicates  $10^{-8}$  M. + indicates inclusion, - indicates exclusion. TCP is tissue culture-treated plastic.

**Table S1. Slope of linear region of A-HRP remaining on surface of silk films after release studies**

| <b>Adsorption Time</b> | <b>Slope (AU/s)</b>                             |
|------------------------|-------------------------------------------------|
| Overnight              | $4.44 \times 10^{-3} \pm 8.48 \times 10^{-4**}$ |
| 1-hour                 | $1.86 \times 10^{-3} \pm 1.84 \times 10^{-4}$   |

Data presented as mean  $\pm$  SEM. Slope of overnight group is significantly greater than slope of 1-hour group ( $p < 0.01$ ). Data is generated from three independent experiments with 8 samples each ( $**p < 0.01$ ).
